# Supplementary material for: A Multiplex Label-Free Approach to Avian Influenza Surveillance and Serology
Source: PubMed Central journal article supplement (PMC4524619; doi:10.1371/journal.pone.0134484), 2015-08-04
Supplement: pone.0134484.s001.pdf [file pone.0134484.s001.pdf]

## Field Sample Responses

The Figure below is an alternative version of Figure 4 from the main text. Here, the actual response (thickness in Ångstroms) for each antigen is presented for chips treated with 18% field serum are reported relative to control. Color coding (blue = low to red = high) is scaled by antigen.

|               |       | Sample |       |       |       |       |       |       |      |       |       |       |      |       |
|---------------|-------|--------|-------|-------|-------|-------|-------|-------|------|-------|-------|-------|------|-------|
|               |       | A      | B     | C     | D     | E     | F     | G     | H    | I     | J     | K     | L    | M     |
| Hemagglutinin | H1N1  | 3.12   | 8.14  | 1.89  | 7.65  | 1.57  | 1.84  | 0.25  | 0.84 | -0.27 | 0.58  | 0.25  | 1.21 | -0.98 |
|               | H1N9  | -0.50  | 5.29  | -1.29 | 1.99  | -2.91 | -3.25 | -0.78 | 2.10 | 1.36  | -0.71 | -0.78 | 2.37 | -1.28 |
|               | H2N2  | 5.68   | 5.56  | 1.10  | 8.24  | 0.28  | 1.16  | 2.35  | 3.67 | 1.27  | 1.80  | 2.35  | 4.43 | 0.20  |
|               | H3N2  | 0.70   | 0.34  | 0.15  | -0.66 | -0.64 | 0.25  | 1.08  | 1.38 | -0.13 | 0.38  | 1.08  | 1.12 | -0.72 |
|               | H4N6  | 3.20   | 1.90  | 2.04  | 0.50  | 10.64 | 5.12  | 1.86  | 0.57 | -0.44 | 0.50  | 1.86  | 9.19 | -0.50 |
|               | H5N1  | 1.86   | 1.36  | 0.76  | 2.89  | 0.15  | 1.72  | 0.79  | 1.93 | -0.32 | 0.21  | 0.79  | 0.53 | -1.14 |
|               | H5N8  | 6.17   | 6.33  | 2.50  | 7.81  | 2.55  | 4.00  | 1.14  | 2.19 | 0.40  | 0.50  | 1.14  | 1.00 | -0.79 |
|               | H6N1  | 0.47   | 0.27  | 0.73  | -0.04 | -0.62 | 0.22  | 0.24  | 0.30 | -0.04 | 0.00  | 0.24  | 0.15 | -1.31 |
|               | H6N8  | 0.33   | 2.76  | -0.44 | 1.48  | -1.43 | -0.59 | 0.24  | 2.32 | 0.08  | -0.19 | 0.24  | 4.35 | -1.18 |
|               | H7N9  | -0.20  | -0.23 | -0.14 | -0.62 | -1.22 | -0.13 | 0.53  | 0.94 | -0.49 | 0.30  | 0.53  | 1.84 | 0.50  |
|               | H8N4  | 1.10   | 3.00  | -0.34 | 0.30  | 0.12  | 0.30  | 1.70  | 1.32 | 1.10  | 1.24  | 1.70  | 5.15 | -0.96 |
|               | H9N2  | -1.44  | 1.80  | -2.30 | -1.80 | -2.08 | -1.33 | 1.92  | 2.32 | 1.92  | 2.39  | 1.92  | 3.20 | -0.19 |
|               | H10N3 | 4.74   | 6.88  | 2.37  | 5.24  | 1.74  | 0.39  | -0.78 | 1.54 | 0.08  | -0.20 | -0.78 | 4.63 | -0.20 |
|               | H11N9 | 0.47   | 4.91  | 0.17  | 8.67  | -0.63 | 0.42  | 1.10  | 0.44 | 1.72  | 1.85  | 1.10  | 1.18 | -0.87 |
|               | H12N5 | 2.32   | 6.97  | 1.14  | 1.07  | 0.86  | 1.80  | 2.06  | 1.42 | 3.47  | 2.44  | 2.06  | 4.76 | -1.18 |

S1 Fig
