# Supplementary material for: A Multiplex Label-Free Approach to Avian Influenza Surveillance and Serology
Source: PubMed Central journal article supplement (PMC4524619; doi:10.1371/journal.pone.0134484), 2015-08-04
Supplement: pone.0134484.s002.pdf [file pone.0134484.s002.pdf]

## Polyclonal antiserum titrations

**Figs A-H.** Representative antigen-specific array response(s) to dilution series of H1, H2, H3, H5, H6, H7, H9, and B polyclonal antisera, respectively. Cross-reactivity was negligible throughout, and therefore, not shown except on Figure C as a representative example. Error on each point represents the square root of the sum of squares between the analyte and control group standard deviations for the HA isoforms; N=1, n=10.

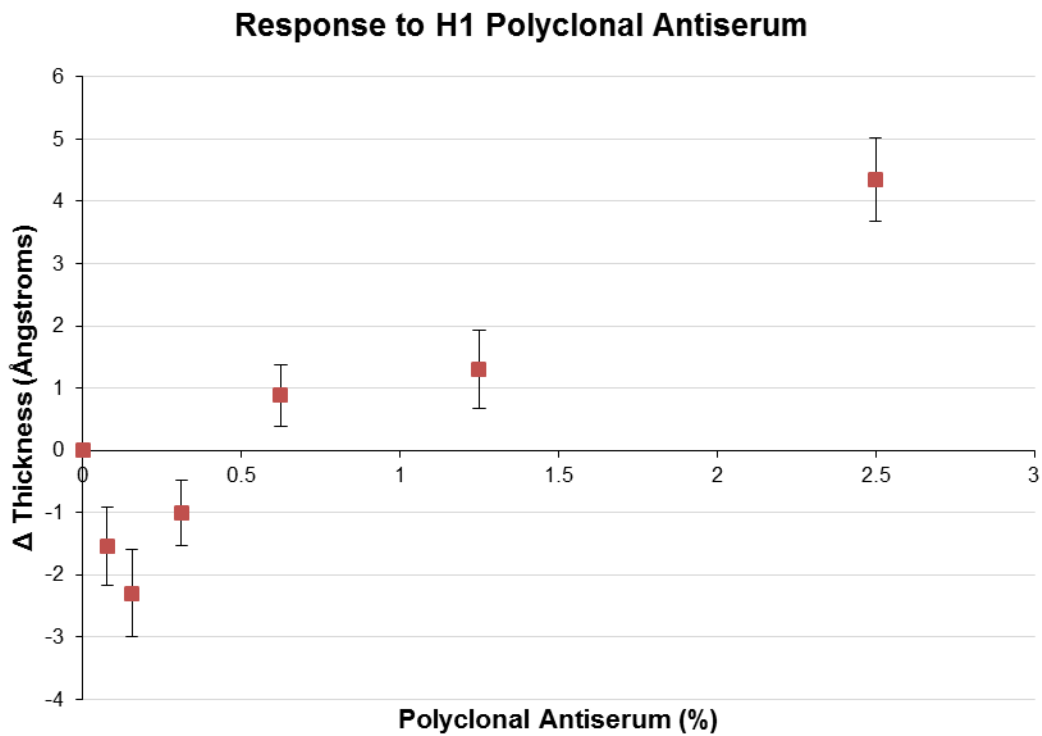

**Figure A: H1 Polyclonal Antiserum Titration.**

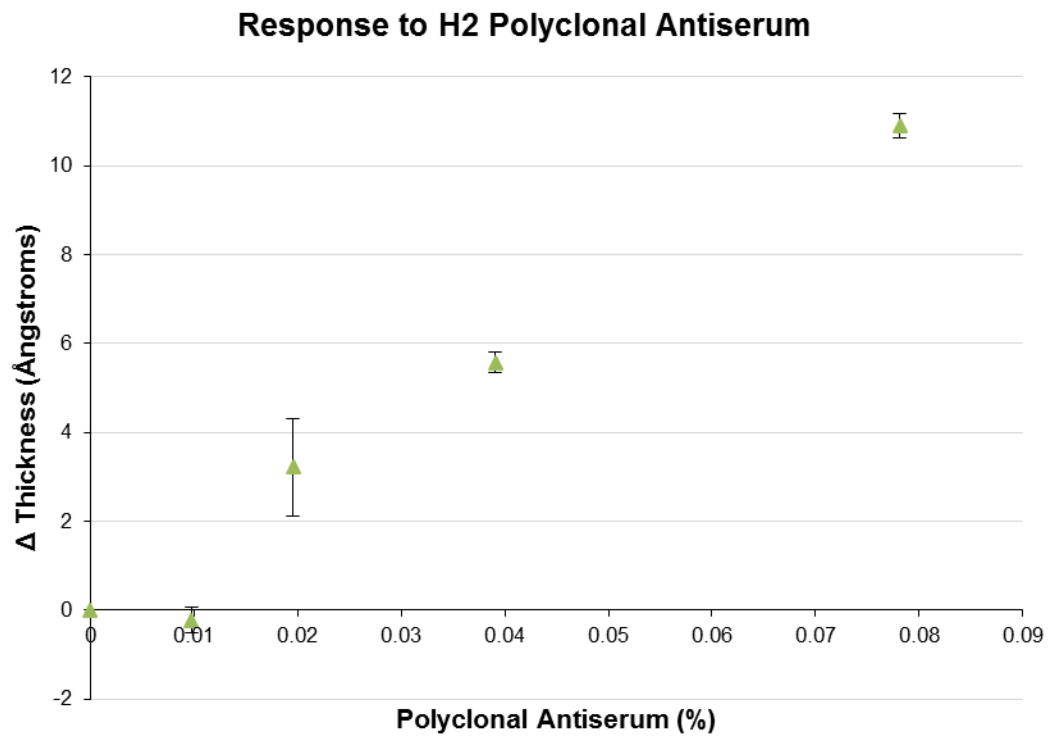

**Figure B: H2 Polyclonal Antiserum Titration.**

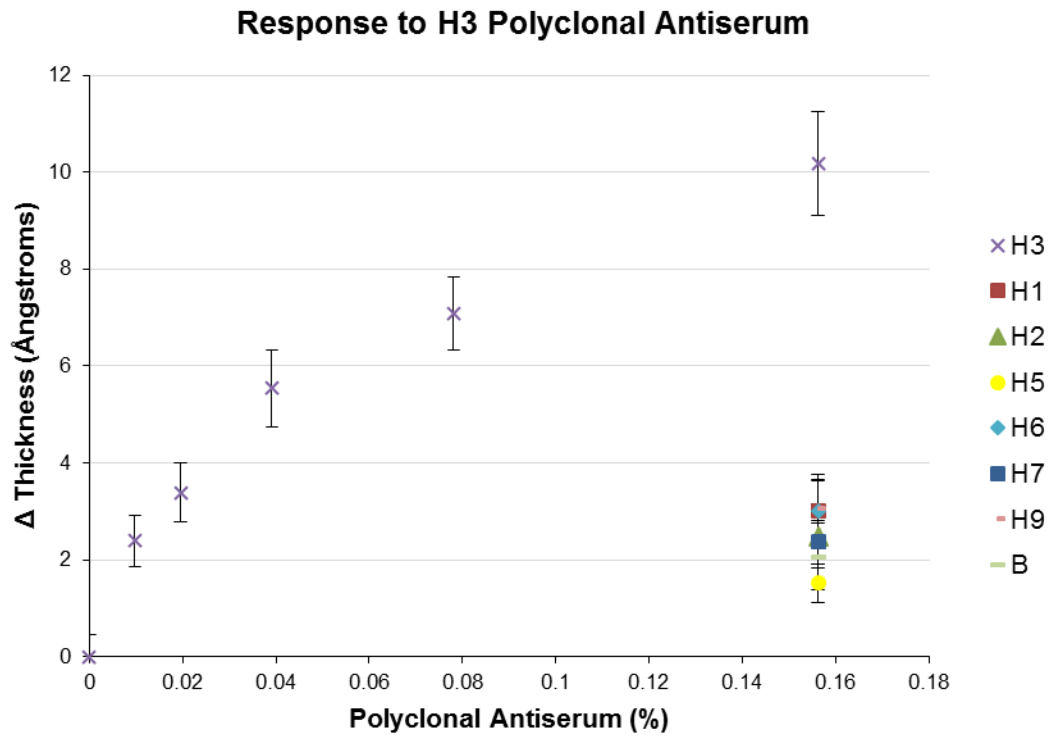

**Figure C: H3 Polyclonal Antiserum Titration.**

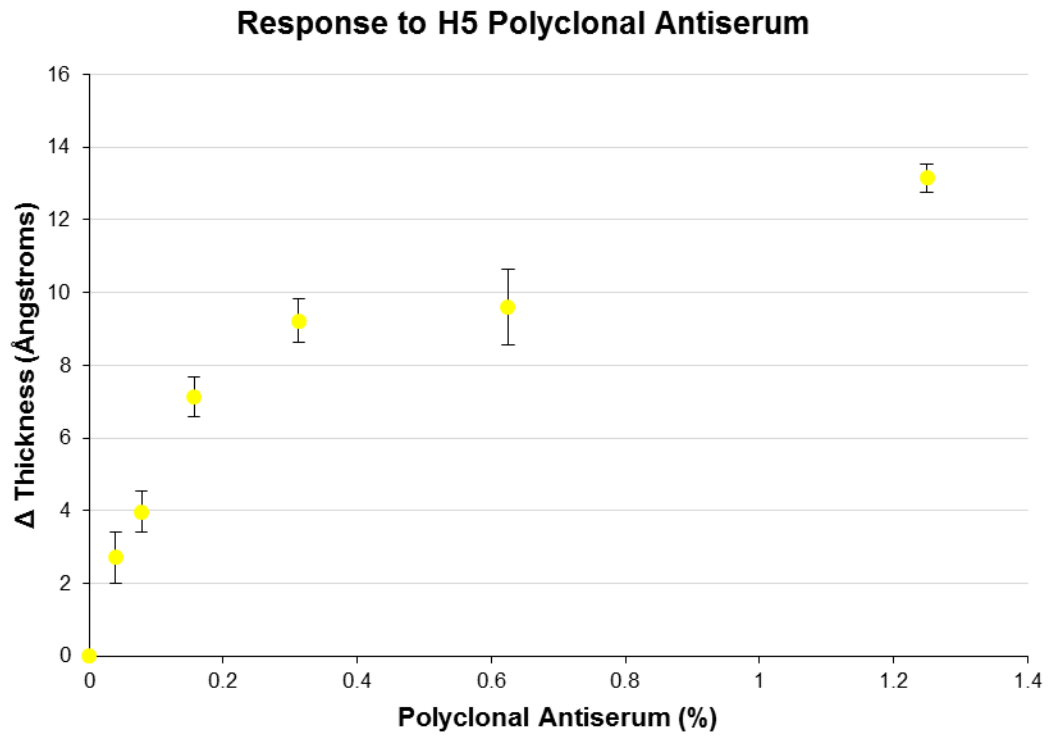

**Figure D: H5 Polyclonal Antiserum Titration.**

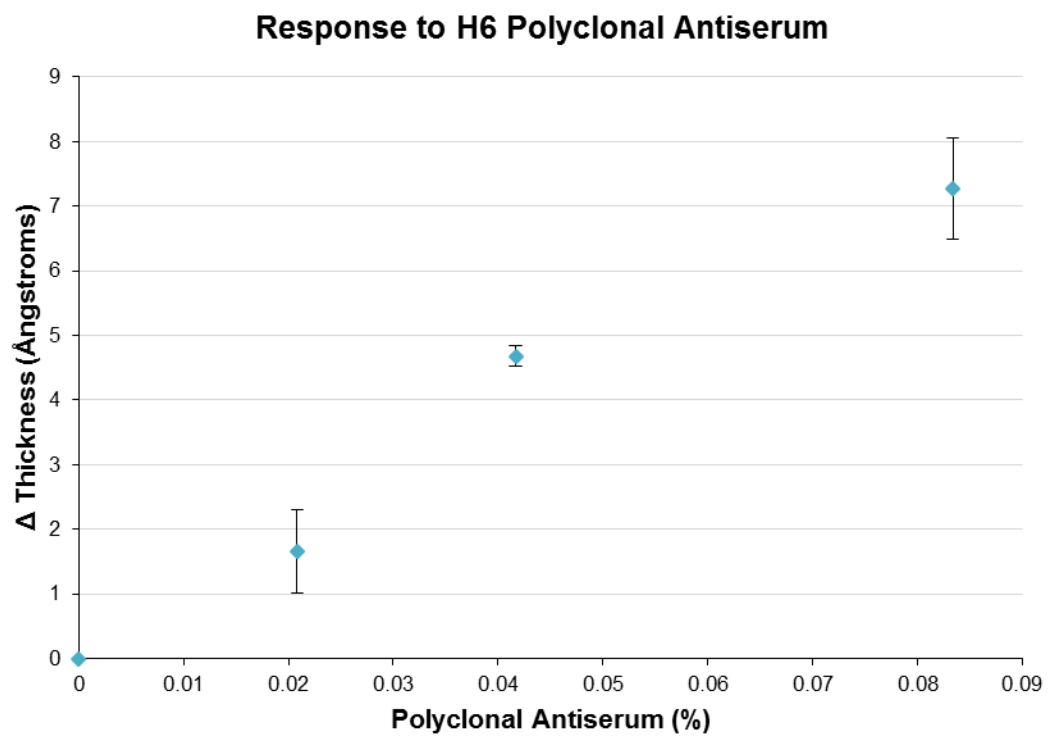

**Figure E: H6 Polyclonal Antiserum Titration.**

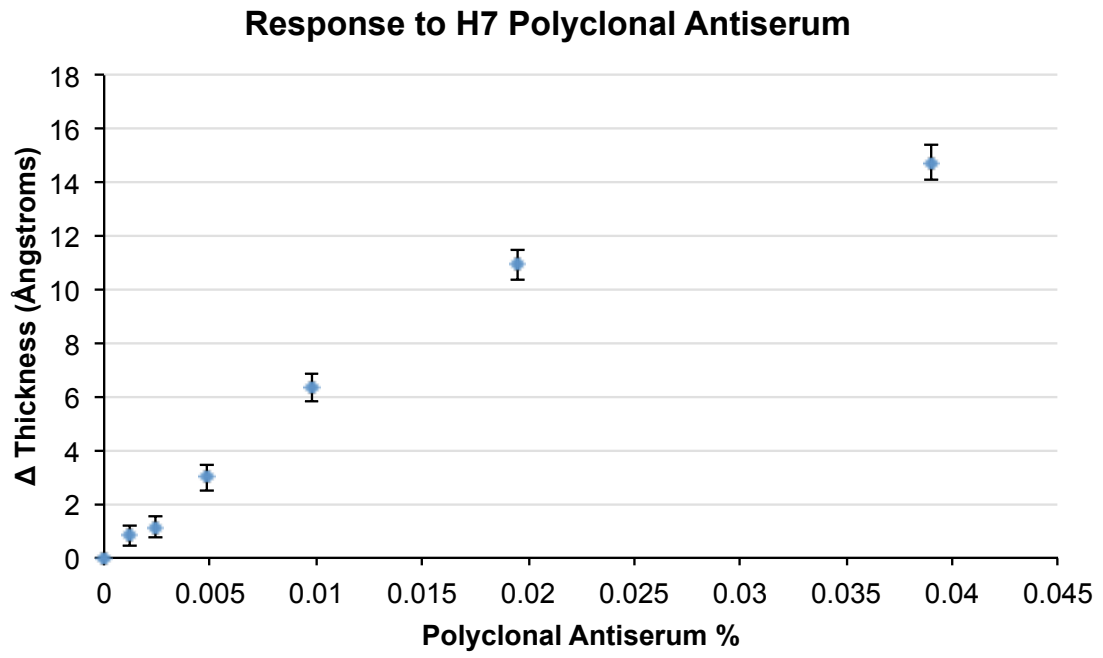

**Figure F: H7 Polyclonal Antiserum Titration.**

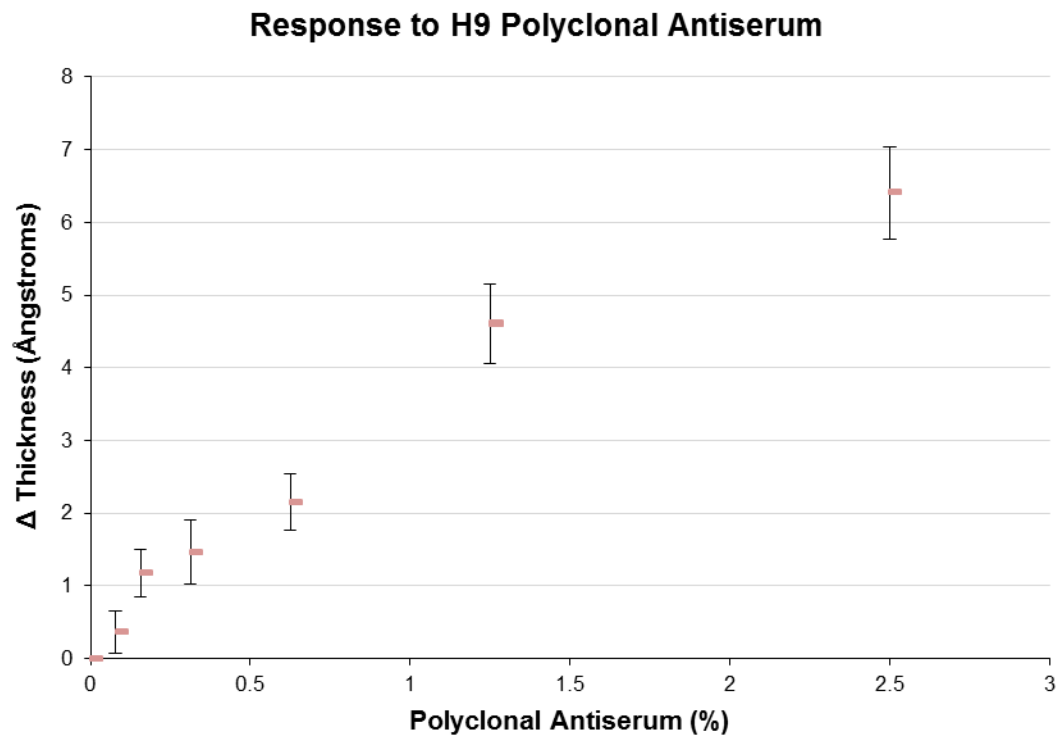

**Figure G: H9 Polyclonal Antiserum Titration.**

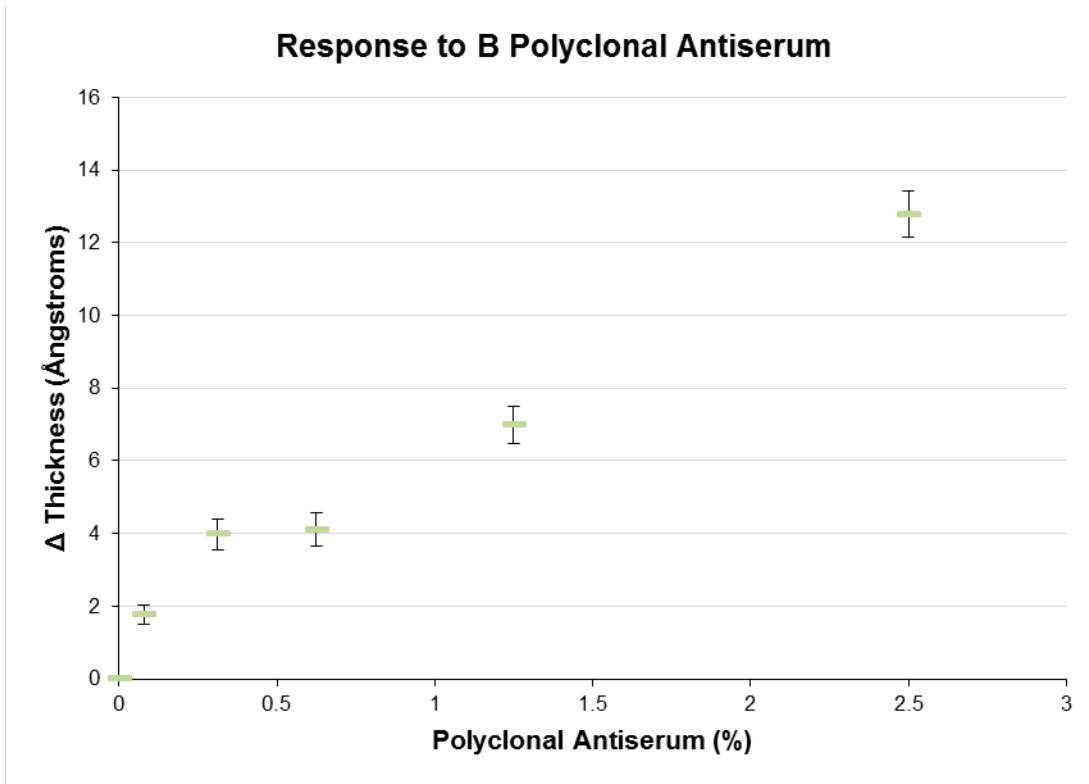

**Figure H: Type B Polyclonal Antiserum Titration.**
